# Supplementary material for: {Cu2SiW12O40}@HKUST-1 synthesized by a one-step solution method with efficient bifunctional activity for supercapacitors and the oxygen evolution reaction
Source: Royal Society of Chemistry journal article supplement (doi:10.1039/d1ta01503f), 2021-01-01
Supplement: d1ta01503f1.pdf [file d1ta01503f1.pdf]

## Supplementary Information

### **{Cu<sub>2</sub>SiW<sub>12</sub>O<sub>40</sub>}@HKUST-1 synthesized by the one-step solution method with efficient bifunctional activity for supercapacitor and oxygen evolution reaction**

Huan Liu<sup>a</sup>, Li-Ge Gong<sup>a,b\*</sup>, Chun-Xiao Wang<sup>a</sup>, Chun-Mei Wang<sup>a</sup>, Kai Yu<sup>a,b\*</sup>, Bai-Bin Zhou<sup>a,b\*</sup>

POMOFs constructed of polyoxometalates (POMs) and metal-organic frameworks (MOF) are very desirable for high-efficiency supercapacitor performance and electrocatalytic water oxygen evolution reaction, but it is still challenging. Herein, successfully synthesized the {Cu<sub>2</sub>SiW<sub>12</sub>O<sub>40</sub>}@HKUST-1 material through a one-step solution method. The synergy between {Cu<sub>2</sub>SiW<sub>12</sub>O<sub>40</sub>} and HKUST-1 can promote mass/charge transfer and the adsorption/desorption of intermediates on {Cu<sub>2</sub>SiW<sub>12</sub>O<sub>40</sub>}@HKUST-1. In the three-electrode system, {Cu<sub>2</sub>SiW<sub>12</sub>O<sub>40</sub>}@HKUST-1 electrode material has a specific capacitance of 5096.5F g<sup>-1</sup> when the current density is 1A g<sup>-1</sup>, after 6000 cycles, the retention rate is 92%, which is much higher than reported in the literature. The symmetrical electrode is assembled with foamed nickel as the current collector, in the 1.0V voltage window, the power density is 510.81W kg<sup>-1</sup>, and the energy density is 15.31Wh kg<sup>-1</sup>. In 1.0 M KOH aqueous solution, when the scanning speed is 5mV s<sup>-1</sup>, the overpotential of electrocatalytic water oxygen evolution reaction(OER) is 340mV (without iR compensation). Especially at high current density, {Cu<sub>2</sub>SiW<sub>12</sub>O<sub>40</sub>}@HKUST-1 shows better performance than commercial RuO<sub>2</sub>. Further, it has excellent catalytic durability. It provides a basis for the further application of POMOFs.

## Table of Contents

|                                                                                                     |    |
|-----------------------------------------------------------------------------------------------------|----|
| Table of Contents .....                                                                             | 2  |
| 1. Experimental Procedures .....                                                                    | 3  |
| 1.1 Material characterization method .....                                                          | 3  |
| 1.2 Electrode preparation and electrochemical characterization for SCs.....                         | 3  |
| 2. Results and Discussion .....                                                                     | 4  |
| 2.1 The characterization diagrams .....                                                             | 4  |
| 2.2 Supercapacitor test chart of compounds .....                                                    | 6  |
| 2.3 Electrocatalytic water oxygen production diagram of compounds .....                             | 7  |
| 2.4 Comparison of the properties of the Keggin-based materials with published supercapacitors ..... | 12 |
| 3. References .....                                                                                 | 12 |

## 1. Experimental Procedures

### 1.1 Material characterization method

In the Bruker Ver Tex 80 Fourier Transform Infrared Spectrometer (FTIR spectrometer) using KBr particles, the absorption spectrum in the range of 400-4000  $\text{cm}^{-1}$  was recorded. The powder X-ray diffraction (XRD) pattern using Cu-K $\alpha$  irradiation ( $\lambda=1.54056\text{\AA}$ ) was measured on a Bruker D8 Advance in the  $2\theta$  range of 20-80°. Scanning electron microscopy (SEM) images are characterized by Hitachi SU70 SEM coupling with an energy dispersive X-ray (EDX) detector. Transmission electron microscope (TEM) images were obtained from Tecnai G2 F20. X-ray photoelectron spectroscopy (XPS) analysis was performed on the AXIS ULTRA DLD electronic spectrometer by the Mg Ka (1253.6eV) achromatic X-ray source. Brunauer Emmett-Teller (BET) surface area was captured by N<sub>2</sub> adsorption measurement using Nova 2000E at 77.3 K. Brunauer Emmett-Teller (BET) surface area was captured by N<sub>2</sub> adsorption measurement using Nova 2000E at 77.3 K.

### 1.2 Electrode preparation and electrochemical characterization for SCs

Preparation of glassy carbon electrode(GCE): The composite electrode is made by mixing the active material and conductive carbon black with a mass ratio of 1:4. Weigh 5mg {Cu<sub>2</sub>SiW<sub>12</sub>O<sub>40</sub>}@HKUST-1 and add certain naphthol as dispersant, disperse it ultrasonically for 40min to get a uniform turbid liquid. We used a pipette to remove 5 $\mu\text{L}$  drops on a pretreated glassy carbon electrode with a diameter of 3mm. After drying at room temperature,  $\mu\text{L}$  of 0.5% Nafion solution was dropped on the surface of the glassy carbon electrode, and dried in vacuum as the working electrode.

Preparation of nickel foam(NF) electrode: The NF was sonicated first with acetone for 30min and subsequently with 3 M HCl for 30 min. Thereafter, it was washed with distilled water and ethanol and then placed in a vacuum oven. Grind and mix the active material and acetylene black in a ratio of 1:1, add a certain amount of ethanol to dissolve ultrasonically, cut the nickel foam into 1 $\times$ 3cm<sup>2</sup> size, and apply 3mg to the nickel foam. Using a tablet press, the nickel foam was pressed into a sheet at 2MPa for 8 seconds.

Assembly of symmetrical button batteries: Cut two foam nickel sheets with a diameter of 1cm, apply the material to the foam nickel and press with a tablet machine. Put a piece into the positive electrode shell of the button electrode, then add a few drops of Na<sub>2</sub>SO<sub>4</sub>(1M) solution. Then add a diaphragm. Put another piece of nickel foam on top, then add one or two drops of Na<sub>2</sub>SO<sub>4</sub> (1M). Put the metal plate shrapnel on it, and finally put the negative electrode.

Preparation of electrocatalytic water electrode: Grind the active material and acetylene black at a ratio of 2:1, weigh 5mg {Cu<sub>2</sub>SiW<sub>12</sub>O<sub>40</sub>}@HKUST-1 and add ethanol as a dispersant to it, and ultrasonically form a uniform solution. We use a pipette to drop 5 $\mu\text{L}$  on the pretreated glassy carbon electrode with a diameter of 3mm. At room temperature, 7 $\mu\text{L}$  of 0.5% Nafion solution was dropped on the surface of the glassy carbon electrode and dried in a vacuum as a working electrode.

$$i = av^b \quad \text{Equation(S1)}$$

Where  $i$  is the peak current density,  $v$  is scan rate, and  $a$  and  $b$  are coefficients.

$$Q = Q_c + Q_d \quad \text{Equation(S2)}$$

The surface treatment controls charge ( $Q_c$ ). the diffusion control charge ( $Q_d$ )

$$Q = Q_c + kv^{-1/2} \quad \text{Equation(S3)}$$

Where k = variable parameter. Q = stored charge, v = scan rate.

$$C = \frac{2i_m \int V dt}{V^2 \left| \frac{V_f}{V_i} \right.} \quad \text{Equation(S4)}$$

$C(\text{F g}^{-1})$  is the specific capacitance of the constant current charge and discharge curve.  $i_m(\text{A g}^{-1})$  represents the current density,  $\int V dt$  is the current in the integration region,  $V_i$  and  $V_f$  represent the initial and final values of the potential.

$$C_s = I \cdot t / (m \cdot \Delta V) \quad \text{Equation(S5)}$$

Where  $C_s$  represents the specific capacitance,  $I$  is the charge and discharge current(A),  $t$  is the discharge time(s),  $m(\text{g})$  represents the load mass of the active material, and  $\Delta V$  is the voltage difference (V).

## 2. Results and Discussion

### 2.1 The characterization diagrams

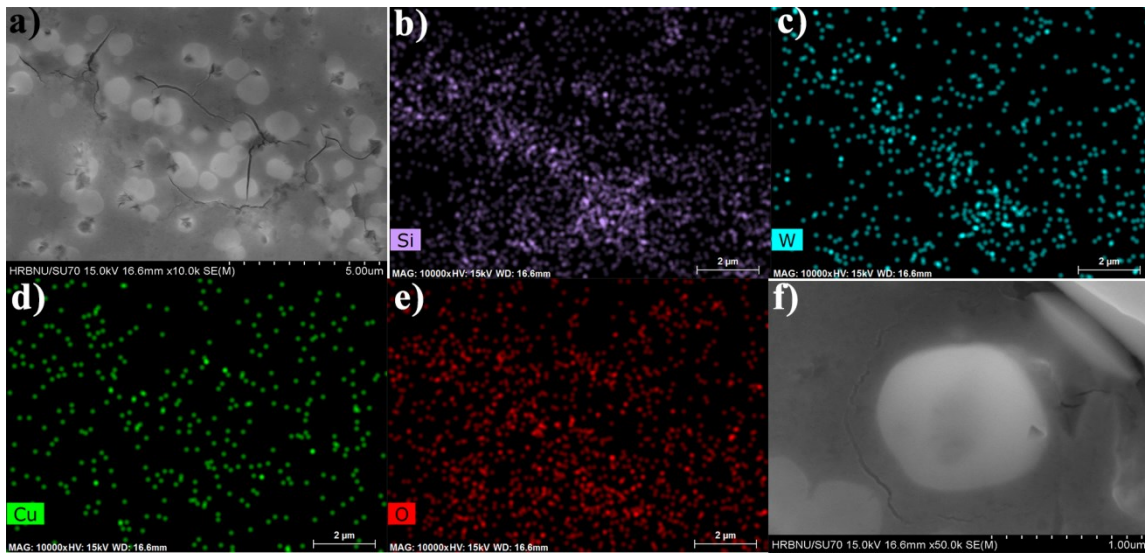

**Figure S1** (a,f) SEM images; (b-e) EDX of Si, W, Cu and O of  $\text{Cu}_2\text{SiW}_{12}\text{O}_{40}$ .

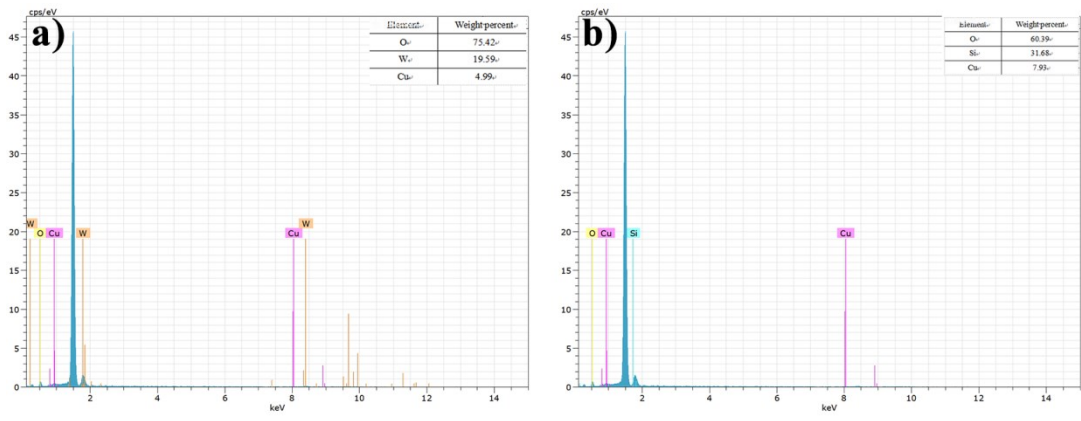

Figure S2. EDS of  $\text{Cu}_2\text{SiW}_{12}\text{O}_{40}$ .

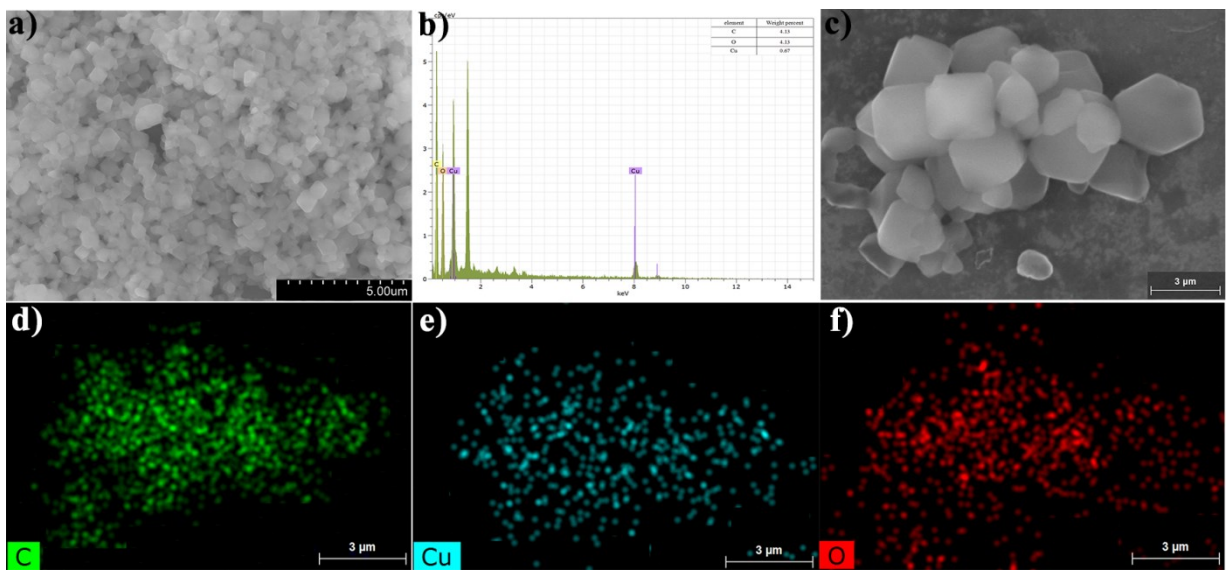

Figure S3. (a,c) SEM images; (b) EDS of HKUST-1. (d-f) EDX of C, Cu and O of HKUST-1.

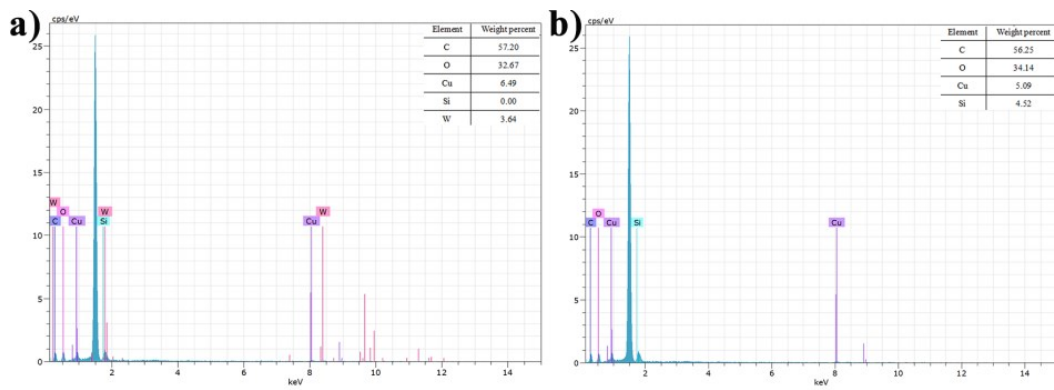

Figure S4. EDS of  $\{\text{Cu}_2\text{SiW}_{12}\text{O}_{40}\}@$ HKUST-1.

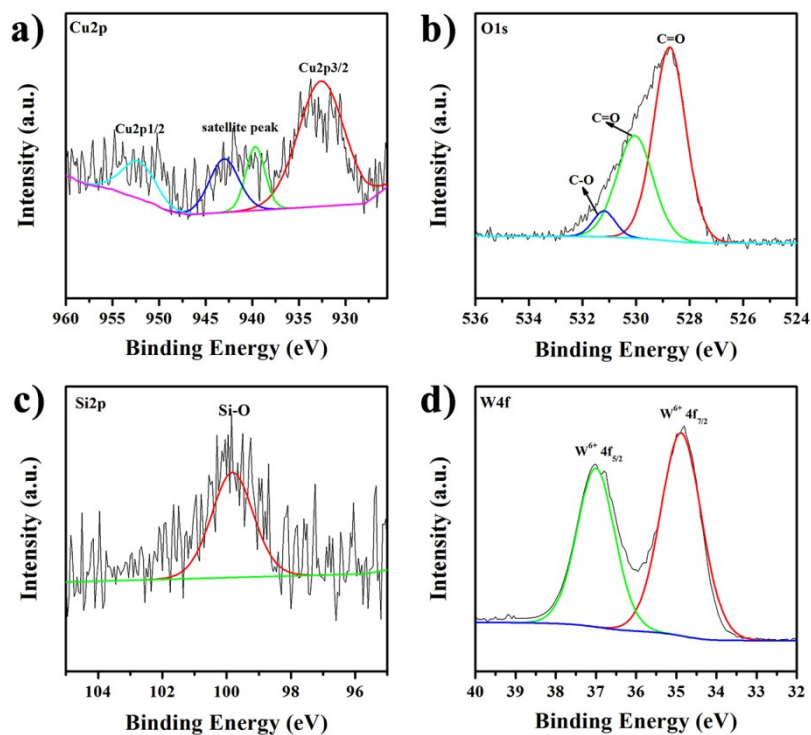

Figure S5. XPS spectra of  $\text{Cu}_2\text{SiW}_{12}\text{O}_{40}$ : (a) Cu, (b) O, (c) Si and (d) W.

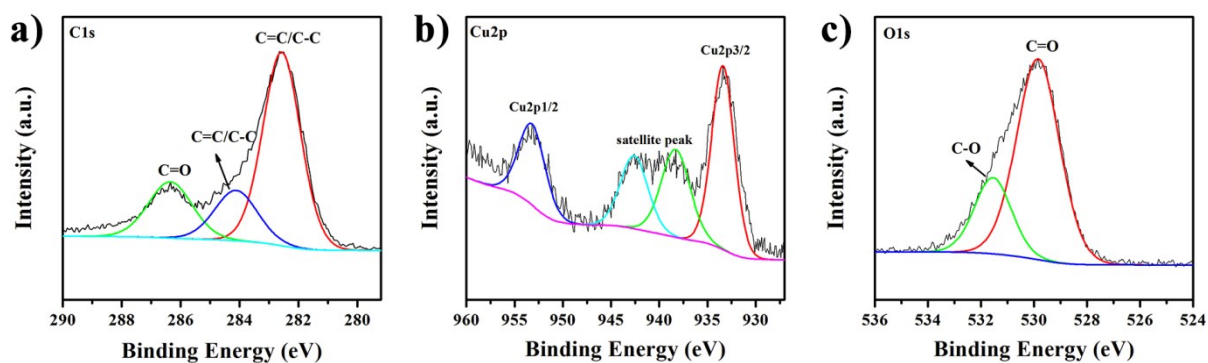

Figure S6. XPS spectra of HKUST-1: (a) C, (b) Cu and (c) O.

## 2.2 Supercapacitor test chart of compounds

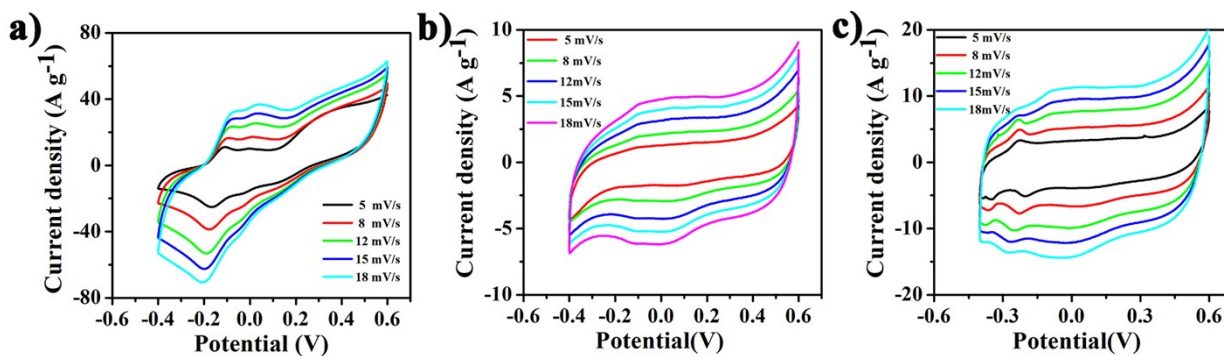

Figure S7. The CVs at different scan rates: (a)  $\{\text{Cu}_2\text{SiW}_{12}\text{O}_{40}\}@$ HKUST-1, (b)  $\text{Cu}_2\text{SiW}_{12}\text{O}_{40}$ , (c) HKUST-1.

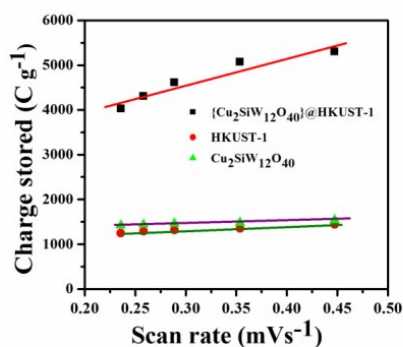

**Figure S8.** Plot of the total charge stored ( $q$ ) vs. the reciprocal of the square root of the scan rate.

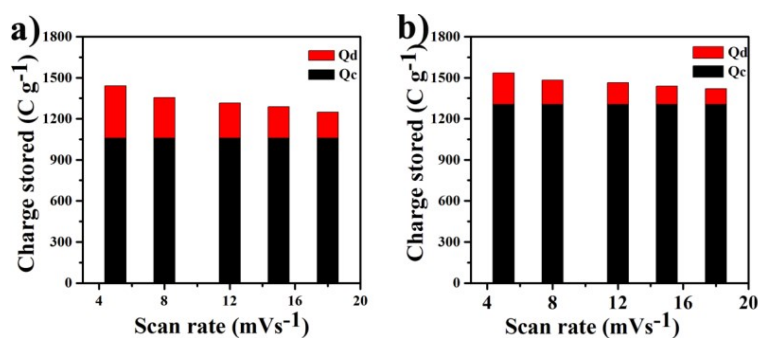

**Figure S9.** Normalized contribution ratio of the capacitive ( $Q_c$ ) and diffusion-controlled ( $Q_d$ ) charge storage capacities at lower scan rates of (a) HKUST-1, (b)  $\text{Cu}_2\text{SiW}_{12}\text{O}_{40}$ .

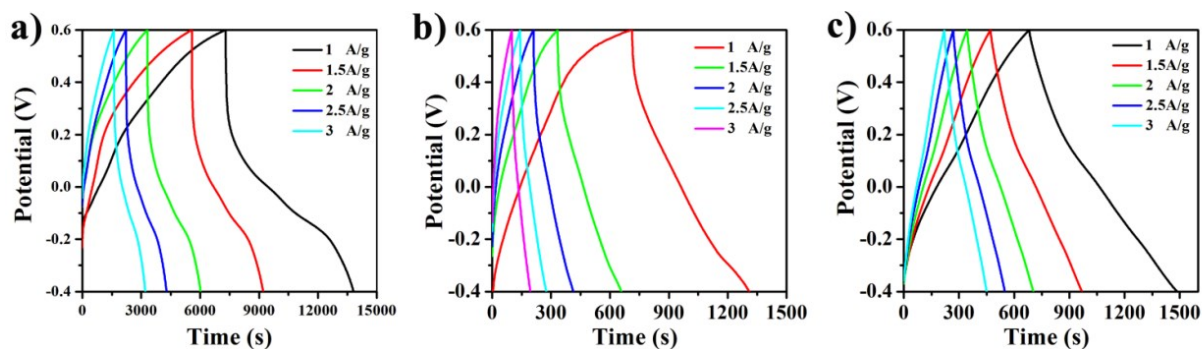

**Figure S10.** The GCD of (a)  $\{\text{Cu}_2\text{SiW}_{12}\text{O}_{40}\}$ @HKUST-1, (b) HKUST-1, (c)  $\text{Cu}_2\text{SiW}_{12}\text{O}_{40}$  at different current densities.

### 2.3 Electrocatalytic water oxygen production diagram of compounds

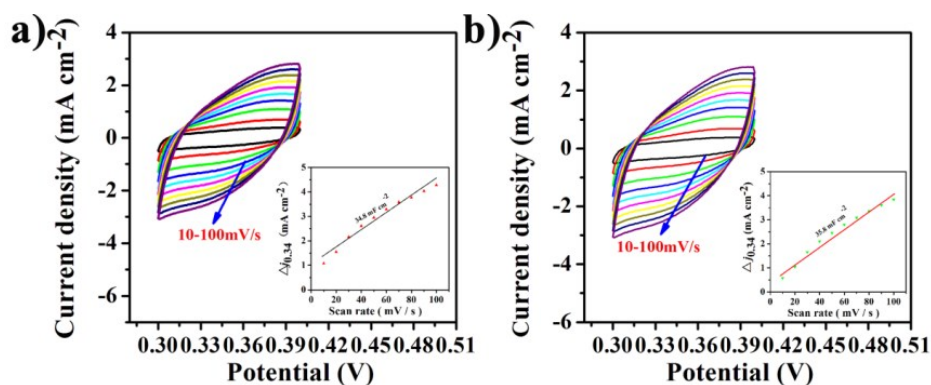

**Figure S11.** CVs of (a) HKUST-1; (b)  $\text{Cu}_2\text{SiW}_{12}\text{O}_{40}$  with different rates from 10 to 100  $\text{mV s}^{-1}$ . Inset: The capacitive current at 0.34V as a function of the scan rate for (a) HKUST-1. (b)  $\text{Cu}_2\text{SiW}_{12}\text{O}_{40}$ .

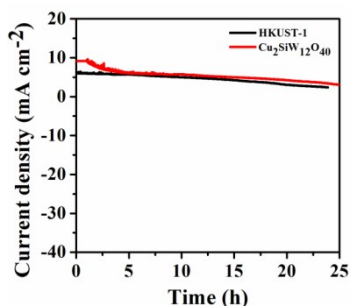

**Figure S12.** Time-dependent current density curve of HKUST-1 and  $\text{Cu}_2\text{SiW}_{12}\text{O}_{40}$ .

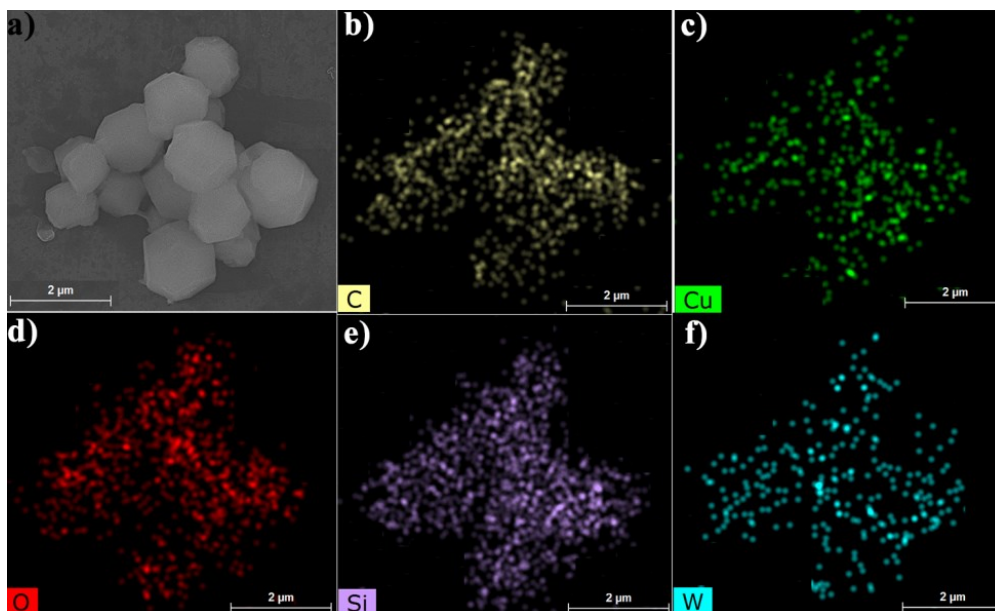

**Figure S13.** (a) SEM image of the  $\{\text{Cu}_2\text{SiW}_{12}\text{O}_{40}\}$ @HKUST-1 catalyst after OER stability test, (b-f) EDX of C, Cu, O, Si and W.

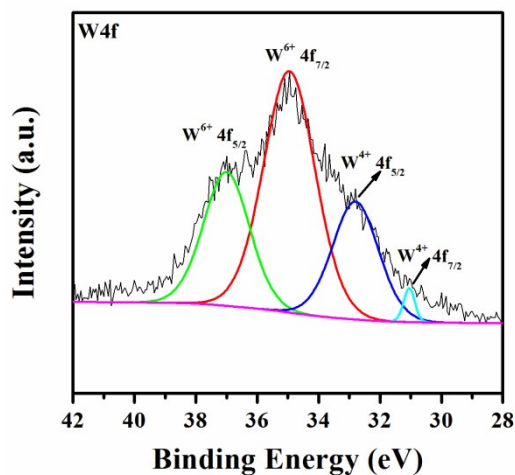

**Figure S14.** The W<sub>4f</sub> XPS spectra of  $\{\text{Cu}_2\text{SiW}_{12}\text{O}_{40}\}$ @HKUST-1 after OER tests.



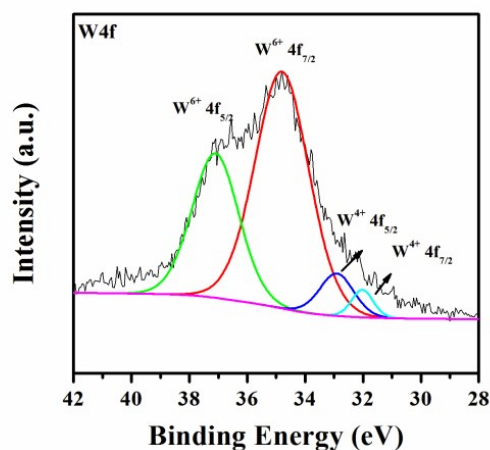

**Figure S15.** The W4f XPS spectra of  $\text{Cu}_2\text{SiW}_{12}\text{O}_{40}$  after OER tests.

## 2.4 Comparison of the properties of the Keggin-based materials with published supercapacitors

**Table S1 Comparison of the properties of the Keggin-based materials with published supercapacitors**

|   | Compound                                         | The capacitances                                   | The cyclic stability  | collector                   | Ref |
|---|--------------------------------------------------|----------------------------------------------------|-----------------------|-----------------------------|-----|
| 1 | PAni/ $\text{H}_3\text{PMo}_{12}\text{O}_{40}$   | $120\text{F g}^{-1}$                               | 70%<br>(1000 cycles)  | Rigid graphite plate        | [1] |
| 2 | MWCNT/ $\text{Cs}_x\text{PMo}_{12}\text{O}_{40}$ | $285\text{ F g}^{-1}$<br>( $0.2\text{ A g}^{-1}$ ) | ----                  |                             | [2] |
| 3 | $\text{H}_3\text{PMo}_{12}\text{O}_{40}$ /MWCNT  | $38\text{ F g}^{-1}$<br>( $1\text{ A g}^{-1}$ )    | -----                 | porous glassy fibrous paper | [3] |
| 4 | $[\text{BMIM}]_4\text{SiW}_{12}\text{O}_{40}$    | $172\text{ F g}^{-1}$<br>( $20\text{ mV s}^{-1}$ ) | 89%<br>(1100 cycles)  | glassy carbon               | [4] |
| 5 | AC/ $\text{PMo}_{12}\text{O}_{40}$               | $140\text{ F g}^{-1}$<br>( $1\text{ A g}^{-1}$ )   | 91%<br>(8000 cycles)  | glassy carbon               | [5] |
| 6 | AC/ $\text{PW}_{12}\text{O}_{40}$                | $254\text{ F g}^{-1}$<br>( $10\text{ mV s}^{-1}$ ) | 35%<br>(30000 cycles) | Graphite rods               | [6] |
| 7 | RGO/PIL/<br>$\text{PMo}_{12}\text{O}_{40}$       | $408\text{ F g}^{-1}$                              | 98%<br>(2000 cycles)  | stainless steel foil        | [7] |
| 8 | rGO/ $\text{PMo}_{12}\text{O}_{40}$              | $276\text{ F g}^{-1}$                              | 96%<br>(10000 cycles) | Graphite rods               | [8] |

|    |                                                                                                                                                                                             |                                                      |                        |                                        |      |
|----|---------------------------------------------------------------------------------------------------------------------------------------------------------------------------------------------|------------------------------------------------------|------------------------|----------------------------------------|------|
| 9  | SWCNT/TBA/PMo <sub>12</sub> V <sub>2</sub> O <sub>40</sub>                                                                                                                                  | 444 F g <sup>-1</sup><br>(10 mV s <sup>-1</sup> )    | 95%<br>(6500 cycles)   | glassy carbon rods and graphite papers | [9]  |
| 10 | rGO/ PMo <sub>12</sub> O <sub>40</sub>                                                                                                                                                      | 51.2 F g <sup>-1</sup>                               | 95%<br>(5000 cycles)   | commercial flexible carbon cloth       | [10] |
| 11 | AC/PMo <sub>12</sub> O <sub>40</sub>                                                                                                                                                        | 223F g <sup>-1</sup>                                 | 100%<br>(10000 cycles) | Ti foils                               | [11] |
| 12 | PMo <sub>12</sub> -XWxO <sub>40</sub> <sup>3-</sup>                                                                                                                                         | 140 F g <sup>-1</sup><br>(10 A g <sup>-1</sup> )     | 94.6%<br>(1700cycles)  | glassy carbon                          | [12] |
| 13 | [Ag <sub>5</sub> (brtmb) <sub>4</sub> ][VW <sub>10</sub> V <sub>2</sub> O <sub>40</sub> ]                                                                                                   | 206 F g <sup>-1</sup><br>(110 A g <sup>-1</sup> )    | 81.7%<br>(1000 cycles) | glassy carbon                          | [13] |
| 14 | Pinecone AC/PMo <sub>12</sub> O <sub>40</sub>                                                                                                                                               | 361 F g <sup>-1</sup>                                | -----                  | titanium foil                          | [14] |
| 15 | AC/PMo <sub>12</sub> O <sub>40</sub>                                                                                                                                                        | 293F g <sup>-1</sup>                                 | -----                  | C250 carbon monoliths                  | [15] |
| 16 | [Ag <sub>5</sub> (brtmb) <sub>4</sub> ][VW <sub>10</sub> V <sub>2</sub> O <sub>40</sub> ]                                                                                                   | 206 F g <sup>-1</sup><br>(110 A g <sup>-1</sup> )    | 81.7%<br>(1000 cycles) | glassy carbon                          | [16] |
| 17 | rGO-PMo <sub>12</sub>                                                                                                                                                                       | 278 mF cm <sup>-2</sup>                              | 89%<br>(5000 cycles)   | Carbon cloth                           | [17] |
| 18 | rGO-PMo <sub>12</sub>   rGO-PW <sub>12</sub>                                                                                                                                                | 110 F cm <sup>-2</sup><br>(2 mA cm <sup>-2</sup> )   | 95%<br>(2000 cycles)   | carbon cloth                           | [17] |
| 19 | [Cu <sup>I</sup> (btx) <sub>4</sub> ][SiW <sub>12</sub> O <sub>40</sub> ]                                                                                                                   | 110.3 F g <sup>-1</sup><br>( 3.0 A g <sup>-1</sup> ) | 87%<br>(1000 cycles)   | glassy carbon                          | [18] |
| 20 | NENU-5/PPy                                                                                                                                                                                  | 779.8 F g <sup>-1</sup><br>(10 mV s <sup>-1</sup> )  | -----                  | carbon cloth                           | [19] |
| 21 | [H(C <sub>10</sub> H <sub>10</sub> N <sub>2</sub> )Cu <sub>2</sub> ][PMo <sub>12</sub> O <sub>40</sub> ]                                                                                    | 287 F g <sup>-1</sup><br>(1 A g <sup>-1</sup> )      | 81.5%<br>(500 cycles)  | glassy carbon                          | [20] |
| 22 | [H(C <sub>10</sub> H <sub>10</sub> N <sub>2</sub> )Cu <sub>2</sub> ][PW <sub>12</sub> O <sub>40</sub> ]                                                                                     | 153.43F g <sup>-1</sup><br>(1A g <sup>-1</sup> )     | 18.2%<br>(500 cycles)  | glassy carbon                          | [20] |
| 23 | NiPW <sub>12</sub> NP/FrGO                                                                                                                                                                  | 437.6 F g <sup>-1</sup><br>(4 A g <sup>-1</sup> )    | 94.3%<br>(5000 cycles) | carbon paper                           | [21] |
| 24 | mPPy@GO-PMo <sub>12</sub>                                                                                                                                                                   | 115 mF cm <sup>-2</sup><br>(1 mV s <sup>-1</sup> )   | 80%<br>(2000 cycles)   | glassy carbon                          | [22] |
| 25 | [Ag <sub>5</sub> (C <sub>2</sub> H <sub>2</sub> N <sub>3</sub> ) <sub>6</sub> ][H <sub>5</sub> SiMo <sub>12</sub> O <sub>40</sub> ]@15%GO                                                   | 230.2 F g <sup>-1</sup><br>(0.5 A g <sup>-1</sup> )  | 92.7%<br>(1000 cycles) | glassy carbon                          | [23] |
| 26 | [Cu <sup>I</sup> H <sub>2</sub> (C <sub>12</sub> H <sub>12</sub> N <sub>6</sub> )(PMo <sub>12</sub> O <sub>40</sub> )]·[(C <sub>6</sub> H <sub>15</sub> N)(H <sub>2</sub> O) <sub>2</sub> ] | 249 F g <sup>-1</sup><br>(3 A g <sup>-1</sup> )      | 93.5%<br>(1000 cycles) | glassy carbon                          | [24] |
| 27 | [Cu <sup>II</sup> <sub>2</sub> (C <sub>12</sub> H <sub>12</sub> N <sub>6</sub> ) <sub>4</sub> (PMo <sup>VI</sup> <sub>9</sub> Mo <sup>V</sup> <sub>3</sub> O <sub>39</sub> )]               | 154.5F g <sup>-1</sup><br>(3A g <sup>-1</sup> )      | 91.1%<br>(1000 cycles) | glassy carbon                          | [24] |

|    |                                                                                                                                                                                                                                                                      |                                                      |                          |               |      |
|----|----------------------------------------------------------------------------------------------------------------------------------------------------------------------------------------------------------------------------------------------------------------------|------------------------------------------------------|--------------------------|---------------|------|
| 28 | $[\text{Cu}^{\text{I}}_4\text{H}_2(\text{btX})_5(\text{PMo}_{12}\text{O}_{40})_2] \cdot 2\text{H}_2\text{O}$                                                                                                                                                         | 237 F g <sup>-1</sup><br>(2 A g <sup>-1</sup> )      | 92.5%<br>(1000 cycles)   | glassy carbon | [25] |
| 29 | $[\text{Cu}^{\text{I}}_4\text{H}_2(\text{btX})_5(\text{PW}_{12}\text{O}_{40})_2] \cdot 2\text{H}_2\text{O}$                                                                                                                                                          | 100F g <sup>-1</sup><br>(2A g <sup>-1</sup> )        | 90%<br>(1000cycles)      | glassy carbon | [25] |
| 30 | $[\text{Cu}^{\text{II}}\text{Cu}^{\text{I}}_3(\text{H}_2\text{O})_2(\text{btX})_5(\text{PW}^{\text{VI}}_{10}\text{W}^{\text{V}}_2\text{O}_{40})] \cdot 2\text{H}_2\text{O}$                                                                                          | 82.1F g <sup>-1</sup><br>(2A g <sup>-1</sup> )       | 100%<br>(1000cycles)     | glassy carbon | [25] |
| 31 | $[\text{Cu}^{\text{I}}_6(\text{btX})_6(\text{PW}^{\text{VI}}_9\text{W}^{\text{V}}_3\text{O}_{40})] \cdot 2\text{H}_2\text{O}$                                                                                                                                        | 76.4F g <sup>-1</sup><br>(2A g <sup>-1</sup> )       | 100%<br>(1000cycles)     | glassy carbon | [25] |
| 32 | $[\text{Cu}^{\text{II}}\text{Cu}^{\text{I}}_3(\text{btX})_5(\text{SiMo}^{\text{VI}}_{11}\text{Mo}^{\text{V}}\text{O}_{40})] \cdot 4\text{H}_2\text{O}$                                                                                                               | 138.4F g <sup>-1</sup><br>(2A g <sup>-1</sup> )      | 97%<br>(1000cycles)      | glassy carbon | [25] |
| 33 | $[\{\text{Ag}_5(\text{pz})_7\}(\text{BW}_{12}\text{O}_{40})]$                                                                                                                                                                                                        | 1058 F g <sup>-1</sup><br>(2.16 A g <sup>-1</sup> )  | 90.3%<br>(1000 cycles)   | glassy carbon | [26] |
| 34 | $[\{\text{Ag}_5(\text{pz})_7\}(\text{SiW}_{12}\text{O}_{40})](\text{OH}) \cdot \text{H}_2\text{O}$                                                                                                                                                                   | 986F g <sup>-1</sup><br>(2.16A g <sup>-1</sup> )     | 94.5%<br>(1000 cycles)   | glassy carbon | [26] |
| 35 | $(\text{Hpyr})[\{\text{Ag}(\text{pz})\}_2(\text{PMo}_{12}\text{O}_{40})]$                                                                                                                                                                                            | 1611F g <sup>-1</sup><br>(2.16A g <sup>-1</sup> )    | 84.8%<br>(1000 cycles)   | glassy carbon | [26] |
| 36 | $[\text{Cu}^{\text{I}}_3(\text{pz})_2(\text{phen})_3]_2[\text{Cu}^{\text{I}}(\text{phen})_2][\{\text{Na}(\text{H}_2\text{O})_2\}(\text{V}^{\text{IV}}_5\text{Cu}^{\text{II}}\text{O}_6)(\text{As}^{\text{III}}\text{W}_9\text{O}_{33})_2] \cdot 6\text{H}_2\text{O}$ | 825 F g <sup>-1</sup><br>(2.4 A g <sup>-1</sup> )    | 91.4%<br>(3000 cycles)   | glassy carbon | [27] |
| 37 | $[\text{Ag}_5(\text{C}_2\text{H}_2\text{N}_3)_6][\text{H}_5\text{SiMo}_{12}\text{O}_{40}]@15\%\text{GO-based electrode}$                                                                                                                                             | 230.2F g <sup>-1</sup><br>(0.5A g <sup>-1</sup> )    | 92.7%<br>(1000cycles)    | glassy carbon | [28] |
| 38 | $[\text{Ag}(\text{bpy})][\{\text{Ag}(\text{Hbpy})\}_2(\text{AlW}_{12}\text{O}_{40})] \cdot \text{H}_2\text{O}$                                                                                                                                                       | 478.41 F g <sup>-1</sup><br>(1 A g <sup>-1</sup> )   | 95.71%<br>(5000 cycles)  | carbon cloth  | [29] |
| 39 | $[\text{H}_2\text{en}][\{\text{Cu}(\text{bpy})\}_3(\text{AlW}_{12}\text{O}_{40})] \cdot 3\text{H}_2\text{O}$                                                                                                                                                         | 625.99 F g <sup>-1</sup><br>(1 A g <sup>-1</sup> )   | 97.62%<br>(5000 cycles)  | carbon cloth  | [29] |
| 40 | $[\text{Ni}(\text{itmb})_4(\text{HPMo}_{12}\text{O}_{40})] \cdot 2\text{H}_2\text{O}$                                                                                                                                                                                | 477.9 F g <sup>-1</sup><br>(15 A g <sup>-1</sup> )   | -----                    | glassy carbon | [30] |
| 41 | $[\text{Zn}(\text{itmb})_3(\text{H}_2\text{O})(\text{HPMo}_{12}\text{O}_{40})] \cdot 4\text{H}_2\text{O}$                                                                                                                                                            | 890.2 F g <sup>-1</sup><br>(15 A g <sup>-1</sup> )   | -----                    | glassy carbon | [30] |
| 42 | $[\text{Mn}_2(\text{BTC})_{4/3}(\text{H}_2\text{O})_6]_6[\text{K}_8(\text{SiW}_{10}\text{Mn}_2\text{Cl}_4\text{O}_{36})]$                                                                                                                                            | 211.0 F g <sup>-1</sup><br>(1 A g <sup>-1</sup> )    | 96.0%<br>(5000 cycles)   | nickel foam   | [31] |
| 43 | PPD-PMo <sub>12</sub> @rGO                                                                                                                                                                                                                                           | 790 F g <sup>-1</sup><br>(1 mV s <sup>-1</sup> )     | 90.5%<br>(30 000 cycles) | carbon paper  | [32] |
| 44 | PPD-PMo <sub>12</sub>                                                                                                                                                                                                                                                | 550 F g <sup>-1</sup><br>(1 mV s <sup>-1</sup> )     |                          | Carbon paper  | [32] |
| 45 | PMo <sub>12</sub> @GO                                                                                                                                                                                                                                                | 305 F g <sup>-1</sup><br>(1 mV s <sup>-1</sup> )     |                          | carbon paper  | [32] |
| 46 | $(\text{imi})_2[\{\text{Ag}_3(\text{tpb})_2\}_2(\text{H}_2\text{O})\{\text{AsW}_{12}\text{O}_{40}\}_2] \cdot 6\text{H}_2\text{O}$                                                                                                                                    | 929.7 F g <sup>-1</sup><br>( 3.6 A g <sup>-1</sup> ) | 89.6%<br>(5000 cycles)   | glassy carbon | [33] |
| 47 | $[\{\text{Ag}_7\text{bpy}_7\text{Cl}_2\}\{\text{AsW}^{\text{V}}_2\text{W}^{\text{VI}}_{10}\text{O}_{40}\}] \cdot \text{H}_2\text{O}$                                                                                                                                 | 986.1 F g <sup>-1</sup><br>( 3.6 A g <sup>-1</sup> ) | 91.4%<br>(5000 cycles)   | glassy carbon | [33] |

|    |                                                                                                                                                                              |                                                   |                          |                  |           |
|----|------------------------------------------------------------------------------------------------------------------------------------------------------------------------------|---------------------------------------------------|--------------------------|------------------|-----------|
| 48 | AC/TEAPW <sub>12</sub>                                                                                                                                                       | 82 F g <sup>-1</sup><br>(0.5 A g <sup>-1</sup> )  | 93%<br>(10000 cycles)    | aluminum<br>foil | [34]      |
| 49 | [HPMo <sub>12</sub> O <sub>40</sub> ]@[Cu <sub>4</sub> (μ <sub>2</sub> -OH) <sub>2</sub> (C <sub>6</sub> H <sub>5</sub> PO <sub>3</sub> ) <sub>2</sub> (bimb) <sub>4</sub> ] | 267.0F g <sup>-1</sup><br>(5 A g <sup>-1</sup> )  | 95.1%<br>(1000 cycles)   | glassy<br>carbon | [35]      |
| 50 | PMo <sub>10</sub> V <sub>2</sub> @ZIF-67                                                                                                                                     | 475 F g <sup>-1</sup><br>(2 A g <sup>-1</sup> )   | 106.41%<br>(5000 cycles) | Ni<br>foam       | [36]      |
| 51 | {Cu <sub>2</sub> SiW <sub>12</sub> O <sub>40</sub> }@HKUST-1                                                                                                                 | 5096.5F g <sup>-1</sup><br>(1 A g <sup>-1</sup> ) | 92%<br>(6000 cycles)     | glassy<br>carbon | This work |
| 52 | H <sub>4</sub> SiW <sub>12</sub> O <sub>40</sub>                                                                                                                             | 604.6F g <sup>-1</sup><br>(1 A g <sup>-1</sup> )  | 82%<br>(6000 cycles)     | glassy<br>carbon | This work |
| 53 | {Cu <sub>2</sub> SiW <sub>12</sub> O <sub>40</sub> }@HKUST-1                                                                                                                 | 403.7F g <sup>-1</sup> (1 A g <sup>-1</sup> )     | 91.7%<br>(6000 cycles)   | nickel foam      | This work |

## References

- [1] A. K. C. Gallegos, M. L. Cantú, N. C. Pastor, P. G. Romero, *Adv. Funct. Mater.*, 2005, **15**, 1125-1133. DOI:[10.1002/adfm.200400326](https://doi.org/10.1002/adfm.200400326)
- [2] A. K. C. Gallegos, R. M. Rosales, M. Baibarac, P. G. Romero, M. E. Rincón, *Electrochem. Commun.*, 2007, **9**, 2088-2092. DOI:[10.1016/j.elecom.2007.06.003](https://doi.org/10.1016/j.elecom.2007.06.003)
- [3] M. Skunik, M. Chojak, I. A. Rutkowska, P. J. Kulesza, *Electrochim. Acta*, 2008, **53**, 3862-3869. DOI:[10.1016/j.electacta.2007.11.049](https://doi.org/10.1016/j.electacta.2007.11.049)
- [4] M. Ammam, J. Fransaer, *J. Electron. Mater.*, 2011, **158**, A14-A21. DOI:[10.1149/1.3507254](https://doi.org/10.1149/1.3507254)
- [5] V. Ruiz, J. S. Guevara, P. G. Romero, *Electrochem. Commun.*, 2012, **24**, 35-38. DOI:[10.1016/j.elecom.2012.08.003](https://doi.org/10.1016/j.elecom.2012.08.003)
- [6] J. S. Guevar, V. Ruiz, P. G. Romero, *J. Mater. Chem. A*, 2014, **2**, 1014-1021. DOI:[10.1039/c3ta14455k](https://doi.org/10.1039/c3ta14455k)
- [7] M. H. Yang, B. G. Choi, S. C. Jung, Y. K. Han, Y. S. Huh, S. B. Lee, *Adv. Funct. Mater.* 2014, **24**, 7301-7309. DOI:[10.1002/adfm.201401798](https://doi.org/10.1002/adfm.201401798)
- [8] J. S. Guevara, V. Ruiza, P. G. Romero, *Phys. Chem. Chem. Phys.*, 2014, **16**, 20411-20414. DOI:[10.1039/C4CP03321C](https://doi.org/10.1039/C4CP03321C)
- [9] H. Y. Chen, R. A. Oweini, J. Friedl, C. Y. Lee, L. L. Li, U. Körtz, U. Stimming, M. Srinivasan, *Nanoscale*, 2015, **7**, 7934-7941. DOI:[10.1039/c4nr07528e](https://doi.org/10.1039/c4nr07528e)
- [10] D. P. Dubal, J. S. Guevara, D. Tonti, E. Encisoc, P. G. Romero, *J. Mater. Chem. A*, 2015, **3**, 23483-23492. DOI: [10.1039/C5TA05660H](https://doi.org/10.1039/C5TA05660H)
- [11] C. C. Hu, E. B. Zhao, N. Nitta, Magasinski, G. Berdichevsky, G. Yushin, *J. Power Sources*, 2016, **326**, 569-574. DOI:[10.1016/j.jpowsour.2016.04.036](https://doi.org/10.1016/j.jpowsour.2016.04.036)
- [12] Y. H. Ding, J. Peng, H. Y. Lu, Y. Yuan, *RSC Adv.*, 2016, **6**, 81085-81091, DOI: [10.1039/C6RA15381J](https://doi.org/10.1039/C6RA15381J).
- [13] G. N. Wang, T. T. Chen, X. M. Wang, H. Y. Ma, H. J. Pang, *Eur. J. Inorg. Chem.*, 2017, **2017**, 5350-5355. DOI: [10.1002/ejic.201701031](https://doi.org/10.1002/ejic.201701031)
- [14] M. Genovese and K. Lian, *J. Mater. Chem. A*, 2017, **5**, 3939-3947. DOI: [10.1039/C6TA10382K](https://doi.org/10.1039/C6TA10382K)
- [15] P. Palomino, J. S. Guevara, M. O. Marinc, V. Ruiz, D. P. Dubal, P. G. Romero, D. Tonti, E. Enciso, *Carbon*, 2017, **111**, 74-82. DOI: [10.1016/j.carbon.2016.09.054](https://doi.org/10.1016/j.carbon.2016.09.054)
- [16] G. N. Wang, T. T. Chen, X. M. Wang, H. Y. Ma, H. J. Pang, *Eur. J. Inorg. Chem.*, 2017, **45**, 5350-5355. DOI:[10.1002/ejic.201701031](https://doi.org/10.1002/ejic.201701031)
- [17] D. P. Dubal, N. R. Chodankar, A. Vinu, D. H. Kim, P. Gomez-Romero, *ChemSusChem*, 2017, **10**, 2742-2750. DOI: [10.1002/cssc.201700792](https://doi.org/10.1002/cssc.201700792)

- [18] D. F. Chai, Y. Hou, K. P. O'Halloran, H. J. Pang, H. Y. Ma, G. N. Wang, X. M. Wang, *Chem. Electro. Chem.*, 2018, **5**, 3443-3450. DOI: [10.1002/celec.201801081](https://doi.org/10.1002/celec.201801081)
- [19] H. N. Wang, M. Zhang, A. M. Zhang, F. C. Shen, X. K. Wang, S. N. Sun, Y. J. Chen, Y. Q. Lan, *ACS Appl. Mater. Interfaces*, 2018, **10**, 32265-32270. DOI: [10.1021/acsami.8b12194](https://doi.org/10.1021/acsami.8b12194)
- [20] S. Roy, V. Vemuri, S. Maiti, K. S. Manoj, U. Subbarao, and S. C. Peter, *Inorg. Chem.*, 2018, **57**, 12078-12092. DOI: [10.1021/acs.inorgchem.8b01631](https://doi.org/10.1021/acs.inorgchem.8b01631)
- [21] X. G. Sang, X. X. Xu, L. J. Bian, X. X. Liu, Y. Wang, *Solid State Sci.*, 2018, **83**, 8-16, DOI:[10.1016/j.solidstatesciences.2018.06.006](https://doi.org/10.1016/j.solidstatesciences.2018.06.006).
- [22] J. Q. Qin, F. Zhou, H. Xiao, R. Y. Ren, Z. S. Wu, *Sci. China Mater.*, 2018, **61**, 233-242. DOI:[10.1007/s40843-017-9132-8](https://doi.org/10.1007/s40843-017-9132-8).
- [23] Y. Hou, D. F. Chai, B. N. Li, H. J. Pang, H. Y. Ma, X. M. Wang, L. C. Tan, *ACS Appl. Mater. Interfaces*, 2019, **11**, 20845-20853. DOI: [10.1021/acsami.9b04649](https://doi.org/10.1021/acsami.9b04649)
- [24] D. F. Chai, J. J. Xin, B. N. Li, H. J. Pang, H. Y. Ma, K. Q. Li, B. X. Xiao, X. M. Wang and L. C. Tana, *Dalton Trans.*, 2019, **48**, 13026-13033. DOI:[10.1039/C9DT02420D](https://doi.org/10.1039/C9DT02420D)
- [25] D. F. Chai, Carlos J. Gómez-García, B. N. Li, H. J. Pang, H. Y. Ma, X. M. Wang, L. C. Tan, *Chem. Eng. J.*, 2019, **373**, 587-597. DOI:[10.1016/j.cej.2019.05.084](https://doi.org/10.1016/j.cej.2019.05.084)
- [26] N. N. Du, L. G. Gong, L. Y. Fan, K. Yu, H. Luo, S. J. Pang, J. Q. Gao, Z. W. Zheng, J. H. Lv, and B. B. Zhou, *ACS Appl. Nano Mater.*, 2019, **2**, 3039-3049. DOI: [10.1021/acsanm.9b00409](https://doi.org/10.1021/acsanm.9b00409)
- [27] K. P. Wang, K. Yu, J. H. Lv, M. L. Zhang, F. X. Meng, and B. B. Zhou, *Inorg. Chem.*, 2019, **58**, 7947-7957. DOI: [10.1021/acs.inorgchem.9b00692](https://doi.org/10.1021/acs.inorgchem.9b00692)
- [28] Y. Hou, D. F. Chai, B. N. Li, H. J. Pang, H. Y. Ma, X. M. Wang, L. C. Tan, *ACS Appl. Mater. Interfaces*, 2019, **11**, 20845-20853. DOI:[10.1021/acsami.9b04649](https://doi.org/10.1021/acsami.9b04649)
- [29] L. G. Gong, X. X. Qi, K. Yu, J. Q. Gao, B. B. Zhou, G. Y. Yang. *J. Mater. Chem. A*, 2020, **8**, 5709-5720. DOI:[10.1039/C9ta14103k](https://doi.org/10.1039/C9ta14103k)
- [30] G. N. Wang, T. T. Chen, C. J. G. García, F. Zhang, M. Y. Zhang, H. Y. Ma, H. J. Pang, X. M. Wang, L. C. Tan, *Small*, 2020, **16**, 2001626, DOI: [10.1002/smll.202001626](https://doi.org/10.1002/smll.202001626)
- [31] Z. W. Zheng, X. Y. Zhao, L. G. Gong, C. X. Wang, C. M. Wang, K. Yu, B. B. Zhou, *J. Solid State Chem.*, 2020, **288**, 121409, DOI: [10.1016/j.jssc.2020.121409](https://doi.org/10.1016/j.jssc.2020.121409)
- [32] J. Gao, M. X. Tong, Z. Y. Xing, Q. Y. Jin, J. X. Zhou, L. L. Chen, H. L. Xu, G. H. Li, *Chem. Commun.*, 2020, **56**, 7305-7308. DOI: [10.1039/d0cc02464c](https://doi.org/10.1039/d0cc02464c)
- [33] L. P. Cui, K. Yu, J. H. Lv, C. H. Guo, B. B. Zhou, *J. Mater. Chem. A*, 2020, **8**, 22918-22928, DOI:[10.1039/D0TA08759A](https://doi.org/10.1039/D0TA08759A)
- [34] J. J. Zhu, R. B. Vilaua, P. G. Romero, *Electrochim. Acta*, 2020, **362**, 137007, DOI:[10.1016/j.electacta.2020.137007](https://doi.org/10.1016/j.electacta.2020.137007)
- [35] S. B. Li, X. G. Tan, M. Yue, L. Zhang, D. F. Chai, W. D. Wang, H. Pan, L. L. Fan, *Chem. Commun.*, 2020, **56**, 15177-15180. DOI:[10.1039/D0CC06665F](https://doi.org/10.1039/D0CC06665F)
- [36] A. M. Mohamed, M. Ramadan, N. Ahmed, A. O. A. ElNaga, H. H. Alalawy, T. Zaki, S. A. Shaban, H. B. Hassan, N. K. Allam, *J. Energy Storage*, 2020, **28**, 101292, DOI:[10.1016/j.est.2020.101292](https://doi.org/10.1016/j.est.2020.101292)
